# Supplementary material for: Dilation versus laser resection in subglottic stenosis: protocol for a prospective international multicentre randomised controlled trial (AERATE trial)
Source: HighWire-hosted journal article supplement (doi:10.1136/bmjopen-2021-053730), 2022-03-01
Supplement: bmjopen-2021-053730supp001_data_supplement.pdf [file bmjopen-2021-053730supp001_data_supplement.pdf]

|                                                                                   |                           |
|-----------------------------------------------------------------------------------|---------------------------|
|  | Nom du participant: _____ |
| Apposer étiquette pour<br>No Dossier                                              | Date de version: _____    |
|  | Date d'approbation: _____ |
| *DT4617*                                                                          | Signature: _____          |

## FORMULAIRE D'INFORMATION ET DE CONSENTEMENT

**Titre du projet : Résection endoscopique par laser versus dilatation dans la prise en charge de la sténose trachéale : essai randomisé multicentrique**

**Chercheur responsable :** Marc Fortin, MD  
**Cochercheur :** Thibaud Soumagne, MD, PhD  
**Collaborateur :** Hervé Dutau, MD; Nicolas Guibert, MD, PhD  
**Financement :** **Fonds académique de pneumologie interventionnelle de l'IUCPQ-UL**

Nous sollicitons votre participation à un projet de recherche. Cependant, avant d'accepter de participer à ce projet et de signer ce formulaire d'information et de consentement, veuillez prendre le temps de lire, de comprendre et de considérer attentivement les renseignements qui suivent.

Ce formulaire peut contenir des mots que vous ne comprenez pas. Nous vous invitons à poser toutes les questions que vous jugerez utiles au chercheur responsable du projet ou aux autres membres du personnel affecté au projet de recherche et à leur demander de vous expliquer tout mot ou renseignement qui n'est pas clair.

### INTRODUCTION

Vous êtes invité(e) à participer à cette étude en recherche clinique car vous avez une sténose (rétrécissement) de la trachée et votre pneumologue vous a proposé une intervention pour ouvrir cette sténose et redonner à votre trachée une taille normale afin de vous permettre de respirer plus facilement. Il existe plusieurs façons de faire cette intervention, mais nous ignorons encore laquelle est la plus efficace. On peut dilater (ouvrir) la sténose en y gonflant un ballon ou en y passant des tubes de tailles progressivement plus importantes ou on peut brûler la sténose avec un laser. Malheureusement, chez certains patients, la sténose revient dans les années qui suivent l'intervention.

### BUT DE L'ÉTUDE

Dans cette étude, nous voulons déterminer la fréquence de récurrence symptomatique de la sténose trachéale chez les participants ayant eu une dilatation trachéale comparativement à ceux ayant eu un traitement au laser. Environ 100 patients participeront à cette étude en France et au Québec, dont au moins 30 patients à l'IUCPQ-UL.

## DÉROULEMENT DU PROJET DE RECHERCHE

En participant à ce projet, vous serez attiré au hasard à une des procédures endoscopiques étudiée (dilatation ou traitement au laser). Vous ne serez pas mis au courant du traitement que vous recevrez et seul le médecin effectuant la procédure sera au courant. Il sera toutefois possible à tout moment, si jugé médicalement nécessaire, de le savoir.

La visite de sélection et d'inclusion et la réalisation de la procédure endoscopique pourront s'effectuer sur une seule et même journée.

Avant la procédure, chaque patient réalisera une spirométrie et remplira les questionnaires (mMRC, EVA, VHI-10, SF-12). Si vous ne recevez pas de médication pour l'acidité gastrique (inhibiteur de la pompe à proton) au moment de la visite de sélection vous recevrez une prescription pour cette médication. Si vous en prenez déjà vous poursuivez cette médication. Cette médication sera poursuivie au moins jusqu'à la première récurrence de la sténose trachéale. La poursuite au-delà de cette période est à la discrétion de l'équipe traitante. En présence d'effets indésirables attribués par le médecin traitant à cette médication, elle pourra être cessée et son arrêt devra être rapporté. Il s'agit d'une médication généralement très bien tolérée qui a démontré un effet potentiellement protecteur quant à la récurrence des sténoses bénignes des voies aériennes. Aucune autre médication pour la prévention de la resténose ne sera débutée.

La procédure endoscopique sera réalisée par un bronchoscopiste interventionnel sous anesthésie générale. Pendant ce temps vous un support ventilatoire sera assuré par un anesthésiste. L'une des deux procédures suivantes choisie au hasard sera effectuée : le traitement au laser de la sténose ou la dilatation de la sténose avec un ballon ou un tube rigide après y avoir fait une coupure,

Vous recevrez une dose de cortisone intraveineuse durant la procédure et prendrez 2 comprimés de cortisone pendant les 2 jours suivant la procédure.

Vous serez revus en consultation un mois après l'intervention, puis à 6 mois et ensuite tous les 6 mois pour 2 ans de suivi total. À la fin des 2 ans, votre suivi se poursuivra comme à l'habitude, mais le projet de recherche sera terminé. À chaque suivi vous serez examiné, vous répondrez à des questionnaires et vous ferez une spirométrie. Lors du test de spirométrie vous aurez à vous mettre un pince-nez, inspirer et expirer avec force dans un embout buccal à plusieurs reprises. Parfois, ces procédures peuvent causer de la toux, une sensation d'oppression, de l'essoufflement ou un léger étourdissement

|                                                                             | Inclusion | M1 | M6 | M12 | M18 | M24 |
|-----------------------------------------------------------------------------|-----------|----|----|-----|-----|-----|
| <b>Examen clinique</b>                                                      | x         | x  | x  | x   | x   | x   |
| <b>Questionnaires</b> (mMRC, COPD dyspnea, VIH-10, EAT-10, SF-12, FoP-Q-SF) | x         | x  | x  | x   | x   | x   |
| <b>EFR complètes</b>                                                        | x         | x  | x  | x   | x   | x   |
| <b>Endoscopie souple*</b>                                                   |           |    |    | (x) |     | (x) |

Une bronchoscopie de contrôle vous sera proposée à 1 et 2 ans après l'intervention ou avant si vous développez des symptômes de récurrence de la sténose. Il s'agit d'examens qui sont habituellement faits dans le suivi de votre maladie à l'IUCPQ-JL.

## RISQUES ASSOCIÉS AU PROJET DE RECHERCHE

Les risques associés à la dilatation ou le traitement au laser de la sténose trachéale sont les mêmes pour les deux procédures. Si vous décidez de ne pas participer au projet de recherche, il vous est médicalement recommandé de subir une procédure qui vous expose à ces risques. La grande majorité des patients subissant ces interventions n'ont pas d'effets secondaires outre un mal de gorge ou une voix enrouée qui se résout en quelques heures et qui peut durer jusqu'à quelques jours. Les risques plus rares comprennent la baisse du taux d'oxygène dans le sang (hypoxie), le saignement des lèvres, de la bouche, du nez ou des voies aériennes, la blessure dentaire ou d'une lèvre, le bronchospasme, la perforation d'une bronche ou d'un poumon (pneumothorax ou pneumomédiastin), l'enflure de la gorge (œdème laryngé) ou la pneumonie. Il est possible que vous crachiez du sang au cours des 24 heures suivant l'intervention. La quantité est habituellement légère.

La spirométrie peut causer un léger serrement dans la poitrine et de la toux (aggravation des symptômes de l'asthme); ces effets sont temporaires. Un traitement par inhalation d'un bronchodilatateur à action rapide peut être administré si nécessaire pour dilater vos voies respiratoires et vous aider à mieux respirer.

L'anesthésie générale bien qu'elle soit habituellement très sécuritaire, présente quelques risques. Les problèmes les plus fréquents associés à l'anesthésie sont une sensation de malaise ou de vomissements, une ecchymose (bleu) au site des injections, un mal de gorge ou une voix enrouée. Ils s'améliorent généralement très rapidement. Les dents pourraient être endommagées, mais cela est rare. Le risque de lésions au cerveau ou de décès en raison de l'anesthésie est très faible.

## INCONVÉNIENTS ASSOCIÉS AU PROJET DE RECHERCHE

Un inconvénient associé à votre participation à ce projet de recherche est de devoir remplir des questionnaires supplémentaires lors de vos visites de suivi.

## AVANTAGES

Il se peut que vous retiriez un bénéfice personnel de votre participation à ce projet de recherche si vous recevez un traitement qui s'avère plus efficace pour diminuer les risques de récurrence de sténose, mais on ne peut vous l'assurer. Par ailleurs, les résultats obtenus contribueront à l'avancement des connaissances dans ce domaine.

## PARTICIPATION VOLONTAIRE ET POSSIBILITÉ DE RETRAIT

Votre participation à ce projet de recherche est volontaire. Vous êtes donc libre de refuser d'y participer. Vous pouvez également vous retirer de ce projet à n'importe quel moment, sans avoir à donner de raisons, en informant l'équipe de recherche.

Votre décision de ne pas participer à ce projet de recherche ou de vous en retirer n'aura aucune conséquence sur la qualité des soins et des services auxquels vous avez droit ou sur votre relation avec l'équipe qui les dispensent.

Le chercheur responsable du projet de recherche ou le comité d'éthique de la recherche de l'IUCPQ-UL, peuvent mettre fin à votre participation, sans votre consentement, si de nouvelles découvertes ou informations indiquent que votre participation au projet n'est plus dans votre intérêt, si vous ne respectez pas les consignes du projet de recherche ou s'il existe des raisons administratives d'abandonner le projet.

Si vous vous retirez ou êtes retiré du projet, l'information et le matériel déjà recueillis dans le cadre de ce projet seront néanmoins conservés, analysés ou utilisés pour assurer l'intégrité du projet.

Toute nouvelle connaissance acquise durant le déroulement du projet qui pourrait affecter votre décision de continuer d'y participer vous sera communiquée rapidement.

## **CONFIDENTIALITÉ**

Durant votre participation à ce projet, le chercheur responsable ainsi que son personnel recueilleront et consigneront dans un dossier de recherche les renseignements vous concernant et nécessaires pour répondre aux objectifs scientifiques de ce projet.

Ces renseignements peuvent comprendre les informations contenues dans vos dossiers médicaux concernant votre état de santé passé et présent, vos habitudes de vie ainsi que les résultats de tous les tests, examens et procédures que vous aurez à subir durant ce projet. Votre dossier peut aussi comprendre d'autres renseignements tels que votre nom, votre sexe, votre date de naissance et votre origine ethnique.

Tous les renseignements recueillis demeureront strictement confidentiels dans les limites prévues par la loi. Vous ne serez identifié que par un numéro de code. La clé du code reliant votre nom à votre dossier de recherche sera conservée par le chercheur responsable.

Pour assurer votre sécurité, une copie du formulaire de consentement sera versée dans votre dossier médical. Par conséquent, toute personne ou compagnie à qui vous donnerez accès à votre dossier médical aura accès à ces informations.

Le chercheur responsable du projet utilisera les données à des fins de recherche dans le but de répondre aux objectifs scientifiques du projet décrits dans le formulaire d'information et de consentement. Ces données seront conservées pendant 5 ans par le chercheur responsable.

Les données de recherche pourront être publiées ou faire l'objet de discussions scientifiques, mais il ne sera pas possible de vous identifier.

À des fins de surveillance et de contrôle, de protection, de sécurité votre dossier de recherche ainsi que vos dossiers médicaux pourront être consultés par une personne mandatée de l'établissement, ou du comité d'éthique de la recherche de l'IUCPQ-UL. Ces personnes et ces organismes adhèrent à une politique de confidentialité.

Vous avez le droit de consulter votre dossier de recherche pour vérifier les renseignements recueillis, et les faire rectifier au besoin.

## **FINANCEMENT DU PROJET DE RECHERCHE**

La réalisation de ce projet de recherche sera financée par le fonds local de l'IUCPQ-UL du chercheur : *Fonds académique de pneumologie interventionnelle*.

## **INDEMNISATION EN CAS DE PRÉJUDICE ET DROITS DU PARTICIPANT DE RECHERCHE**

Si vous deviez subir quelque préjudice que ce soit à la suite de toute procédure liée à ce projet de recherche, vous recevrez tous les soins et services requis par votre état de santé.

En acceptant de participer à ce projet, vous ne renoncez à aucun de vos droits et vous ne libérez pas le chercheur responsable de ce projet de recherche et l'établissement de leur responsabilité civile et professionnelle.

## **COMPENSATION**

Vous ne recevrez pas de compensation financière pour votre participation à ce projet de recherche.

## IDENTIFICATION DES PERSONNES-RESSOURCES

Si vous avez des questions ou éprouvez des problèmes en lien avec le projet de recherche, ou si vous souhaitez vous en retirer, vous pouvez communiquer avec le médecin responsable au numéro suivant :

Marc Fortin, MD, pneumologue  
Institut universitaire de cardiologie et de pneumologie de Québec - Université Laval  
2725, chemin Sainte-Foy  
Québec (Québec) G1V 4G5  
Téléphone : (418) 656-8711

## COMMISSAIRE AUX PLAINTES

Pour toute question concernant vos droits en tant que participant à ce projet de recherche ou si vous avez des plaintes ou des commentaires à formuler, vous pouvez communiquer avec :

La commissaire locale aux plaintes et à la qualité des services  
Institut universitaire de cardiologie et de pneumologie de Québec – Université Laval  
2725, chemin Sainte-Foy  
Québec (Québec) G1V 4G5  
Téléphone : 418 656-4945

## SURVEILLANCE DES ASPECTS ÉTHIQUES DU PROJET DE RECHERCHE

Le comité d'éthique de la recherche de l'IUCPQ-UL a approuvé ce projet de recherche et en assure le suivi. Une approbation éthique est obligatoire avant le démarrage du projet. De plus, il approuvera au préalable toute révision et toute modification apportée au formulaire d'information et de consentement et au protocole de recherche.

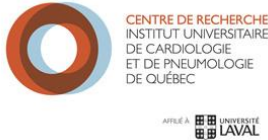

Titre du projet : **Résection endoscopique par laser versus dilatation dans la prise en charge de la sténose trachéale : essai randomisé multicentrique**

**FORMULAIRE DE CONSENTEMENT**

- J'ai pris connaissance du formulaire d'information et de consentement. On m'a expliqué le projet et le présent formulaire d'information et de consentement. On a répondu à mes questions et on m'a laissé le temps voulu pour prendre une décision. Après réflexion, je consens à participer à ce projet de recherche aux conditions qui y sont énoncées.
- J'autorise l'équipe de recherche à avoir accès à mon dossier médical.
- Une copie signée et datée du présent formulaire d'information et de consentement me sera remise.
- J'autorise le chercheur à informer mon médecin traitant de ma participation à ce projet et à lui transmettre les informations pertinentes si ces informations peuvent avoir une utilité clinique : Oui  Non

---

Nom et signature du participant de recherche

Date

J'ai expliqué au participant de recherche les termes du présent formulaire d'information et de consentement et j'ai répondu aux questions qu'il m'a posées.

---

Nom et signature de la personne qui obtient le consentement

Date

Je certifie qu'on a expliqué au participant de recherche les termes du présent formulaire d'information et de consentement, que l'on a répondu aux questions que le participant de recherche avait à cet égard et qu'on lui a clairement indiqué qu'il demeure libre de mettre un terme à sa participation, et ce, sans préjudice.

Je m'engage, avec l'équipe de recherche, à respecter ce qui a été convenu au formulaire d'information et de consentement et à en remettre une copie signée au participant de recherche.

---

Nom et signature du chercheur responsable du projet de recherche

Date
